# Supplementary material for: Genome sequencing in families with congenital limb malformations
Source: Hum Genet. 2021 Jun 22;140(8):1229–39. doi: 10.1007/s00439-021-02295-y (PMC8263393; doi:10.1007/s00439-021-02295-y)
Supplement: Supplementary file 1 — Supplementary file1 (XLSX 20 KB) [file 439_2021_2295_MOESM1_ESM.xlsx]

## Sheet: Tabellenblatt1
Individual	sex	upper limb	lower limb	other	upper limb	lower limb	other	family history
I1	female	HP:0006097	HP:0004691		3-4 finger syndactyly;	2-3 toe syndactyly		healthy parents
I2	male	HP:0006097; HP:0009238; HP:0001180			3-4 finger syndactyly; Aplasia of the 5th finger; Oligodactyly (hands)			healthy parents
I3	male	HP:0003974; HP:0009601			Absent radius; Absent/hypoplastic thumb			no limb malformations stated
I4	male	HP:0009826	HP:0006385	HP:0003498; HP:0001252; HP:0000998; HP:0001629; HP:0004969; HP:0001631	Limb undergrowth	Short lower limbs;	Atria septal defect; Peripheral pulmonary artery stenosis; Ventricular septal defect; Hypertrichosis; Muscular hypotonia; Disproportionate short stature	singleton, no limb malformations stated
I5	female	HP:0006097; HP:0001156; HP:0011300	HP:0005709		3-4 finger syndactyly; Brachydactyly syndrome; Broad fingertip	2-3 toe cutaneous syndactyly		no limb malformations stated
I6	male	HP:0006101	HP:0010051; HP:0004691		Finger syndactyly	2-3 toe syndactyly; Deviation of the hallux		healthy mother, affected father
I7	female	HP:0001177; HP:0001159	HP:0001841; HP:0001159	HP:0001363	Preaxial hand polydactyly; Syndactyly	Preaxial foot polydactyly; Syndactyly	Craniosynostosis;	healthy mother, affected father
I8	female	HP:0009835; HP:0001156			Brachydactyly syndrome; Aplasia/Hypoplasia of the distal phalanges of the hand			no limb malformations stated
I9	male	HP:0001156; HP:0010442; HP:0001159	HP:0010442		Brachydactyly syndrome; Polydactyly; Syndactyly	Polydactyly		mother affected, healthy father
I10	female	HP:0100257	HP:0100257		Ectrodactyly	Ectrodactyly		healthy mother, maternal great-uncle also affected, father no limb malformations stated
I11	male	HP:0006101; HP:0001161	HP:0001770; HP:0001829	HP:0000647	Finger syndactyly; Hand polydactyly	Foot polydactyly; Toe syndactyly	Sclerocornea	singleton, no limb malformations stated
I12	male	HP:0001171			Split hand			healthy parents
I13	male	HP:0001171			Split hand			no limb malformations stated
I14	male	HP:0001171	HP:0010624		Split hand	Aplastic/hypoplastic toenail		daughter and grandson affected	not in our 69 cases
I15	female	HP:0009760; HP:0001156	HP:0010691; HP:0009556	HP:0000062	Antecubital pterygium; Brachydactyly	Mirror image foot polydactyly; Absent tibia	Ambiguous genitalia	no limb malformations stated
I16	male	HP:0005807; HP:0004225	HP:0100387; HP:0005807		Absent distal phalanges; Abnormality of the distal phalanx of the 5th finger	Aplasia of the middle phalanges of the toes; Absent distal phalanges		no limb malformations stated
I17	female	HP:0006097	HP:0004691		3-4 finger syndactyly	2-3 toe syndactyly		healthy mother, affected father
I18	male	HP:0010692; HP:0009843		HP:0010296; HP:0011065; HP:0000286; HP:0000293	2-5 finger syndactyly; Aplasia/Hypoplasia of the middle phalanges of the hand		Ankyloglossia; Conical incisor; Epicanthus; Full cheeks;	no limb malformations stated
I19	female	HP:0009812			Amelia involving the upper limbs			no limb malformations stated
I20	female	HP:0001991			Absent/hypoplastic toes			no limb malformations stated
I21	male	HP:0010708	HP:0010713; HP:0001841		1-5 finger syndactyly	1-5 toe syndactyly; Preaxial foot polydactyly		no limb malformations stated
I22	male	HP:0010692			2-5 finger syndactyly			no limb malformations stated
I23	male	HP:0006264; HP:0009318; HP:0009272; HP:0004209;		HP:0000324; HP:0008049; HP:0000301	Aplasia/Hypoplasia of the 2nd finger; Aplasia/Hypoplasia of the 3rd finger; Aplasia/Hypoplasia of the 4th finger; Clinodactyly of the 5th finger		Facial asymmetry; Abnormality of facial musculature; Abnormality of the extraocular muscles	no limb malformations stated
I24	female	HP:0004050; HP:0009814	HP:0005613		Absent hand; Upper limb peromelia	Aplasia/hypoplasia of the femur		no limb malformations stated
I25	male	HP:0004050; HP:0045009; HP:0040071	HP:0001849	HP:0000347; HP:0000520; HP:0000311; HP:0000470	Absent hands; Abnormal morphology of the radius; Abnormal morphology of ulna	Oligodactyly (feet)	Micrognathia; Proptosis; Round face; Short neck	no limb malformations stated
I26	male	HP:0004058; HP:0001180; HP:0006101	HP:0001849		Hand monodactyly; Hand oligodactyly; Finger syndactyly	Foot oligodactyly		no limb malformations stated
I27	male	HP:0009557; HP:0001500; HP:0010554; HP:0009948; HP:0009949; HP:0009963; HP:0009239; HP:0008398	HP:0010326		Broad finger; Cutaneous finger syndactyly; Aplasia/Hypoplasia of the distal phalanx of the 2nd finger; Duplication of the distal phalanx of the 2nd finger; Duplication of the middle phalanx of the 2nd finger; Duplication of the middle phalanx of the 3rd finger; Aplasia/Hypoplasia of the distal phalanx of the 5th finger; Hypoplastic fifth fingernail	Deviation of the 2nd toe		no limb malformations stated
I28	male	HP:0001161	HP:0001829		Hand polydactyly	Foot polydactyly		no limb malformations stated
I29	male	HP:0006495; HP:0001180; HP:0002986; HP:0002974; HP:0100262;		HP:0000347	Aplasia/Hypoplasia of the ulna; Oligodactyly (hands); Radial bowing; Radioulnar synostosis; Synostosis involving digits		Micrognathia;	healthy parents
I30	male	HP:0009814	HP:0009820	HP:0007413	Upper limb peromelia	Lower limb peromelia;	Nevus flammeus of the forehead	healthy parents
I31	male	HP:0001180; HP:0003864; HP:0006495; HP:0003974	HP:0002990; HP:0006390;	HP:0007483	Oligodactyly (hands); Bifid humerus; Aplasia of the ulna; Absent radius	Anterior tibial bowing; Fibular aplasia;	Depigmentation/Hyperpigmentation of skin	no limb malformations stated
I32	male	HP:0010692; HP:0005831	HP:0010715		2-5 finger syndactyly; Type B brachydactyly	2-5 toe syndactyly		no limb malformations stated
I33	male	HP:0010710; ; HP:0010554; HP:0001180	HP:0004692		Hand oligodactyly; 3-5 finger syndactyly; Cutaneous finger syndactyly	4-5 toe syndactyly		no limb malformations stated
I34	male	HP:0001177	HP:0006426; HP:0002814; HP:0001776	HP:0000126; HP:0000047; HP:0005640;	Preaxial hand polydactyly	Rudimentary to absent tibiae; Abnormality of the lower limb; Bilateral talipes equinovarus	Abnormal vertebral segmentation and fusion; Hypospadias; Hydronephrosis	no limb malformations stated
I35	male	HP:0010690	HP:0010691		Mirror image hand polydactyly	Mirror image foot polydactyly		no limb malformations stated
I36	male	HP:0004058; HP:0003977; HP:0009372	HP:0002866; HP:0008807; HP:0002827; HP:0005613	HP:0008929	Monodactyly (hands); Deformed radius; Type A2 brachydactyly	Aplasia/hypoplasia of the femur; Hip dislocation; Acetabular dysplasia; Hypoplastic iliac wing	Asymmetric short stature	no limb malformations stated
I37	male	HP:0009828	HP:0003175; HP:0009828	HP:0008743; HP:0009099	Peromelia	Hypoplastic ischia; Peromelia	Coronal hypospadias; Median cleft palate	healthy parents
I38	female		HP:0010691			Mirror image foot polydactyly		no limb malformations stated
I39	female	HP:0006088	HP:0002982; HP:0010098; HP:0010068; HP:0001841; HP:0010715; HP:0010096; HP:0010094		1-5 finger complete cutaneous syndactyly	2-5 toe syndactyly; Preaxial foot polydactyly; Broad first metatarsal; Complete duplication of the 1st metatarsal; Complete duplication of the distal phalanx of the hallux; Complete duplication of the proximal phalanx of the hallux; Tibial bowing		no limb malformations stated
I40	male	HP:0006264; HP:0009318; HP:0009272		HP:0000308	Aplasia/Hypoplasia of the 2nd finger; Aplasia/Hypoplasia of the 3rd finger; Aplasia/Hypoplasia of the 4th finger		Microretrognathia	no limb malformations stated
I41	female	HP:0002984; HP:0001180; HP:0001171	HP:0001841; HP:0001760	HP:0005280; HP:0011800; HP:0010808; HP:0000470; HP:0000350; HP:0000104; HP:0008953	Hypoplasia of the radius; Oligodactyly (hands); Split hand	Abnormality of the foot; Preaxial foot polydactyly	Depressed nasal bridge; Hypoplasia of midface; Protruding tongue; Short neck; Small forehead; Renal agenesis; Pectoralis major hypoplasia	healthy parents
I42	female	HP:0009814	HP:0001839; HP:0006380; HP:0001849	HP:0000278; HP:0001363	Upper limb peromelia	Split foot; Knee flexion contracture; Oligodactyly (feet)	Craniosynostosis; Retrognathia	healthy parents
I43	female		HP:0006390; HP:0005772; HP:0002990; HP:0001849			Anterior tibial bowing; Aplasia/Hypoplasia of the tibia; Fibular aplasia; Oligodactyly (feet)		no limb malformations stated
I44	male		HP:0001849; HP:0002990; HP:0006390			Fibular aplasia; Oligodactyly (feet); Anterior tibial bowing		no limb malformations stated
I45	male	HP:0009812; HP:0009606; HP:0006101; HP:0009829	HP:0003097; HP:0009829; HP:0002990; HP:0009818		Amelia involving the upper limbs; Complete duplication of distal phalanx of the thumb; Finger syndactyly; Phocomelia	Amelia involving the lower limbs; Fibular aplasia; Short femur; Phocomelia		no limb malformations stated
I46	male	HP:0004058; HP:0009814	HP:0009820		Monodactyly (hands); Upper limb peromelia	Lower limb peromelia		no limb malformations stated
I47	male		HP:0009818			Amelia involving the lower limbs		no limb malformations stated
I48	male	HP:0009535; HP:0009460; HP:0009281; HP:0006262; HP:0009814	HP:0009820		Aplasia of the 2nd finger; Aplasia of the 3rd finger; Aplasia of the 4th finger; Aplasia/Hypoplasia of the 5th finger; Upper limb peromelia	Lower limb peromelia		healthy parents
I49	female	HP:0001162			Postaxial hand polydactyly			healthy parents
I50	male	HP:0010708; HP:0006265	HP:0001770; HP:0001991; HP:0010715		1-5 finger syndactyly; Aplasia/Hypoplasia of fingers	2-5 toe syndactyly; Aplasia/Hypoplasia of toe; Toe syndactyly		no limb malformations stated
I51	male		HP:0001839			Split foot		no limb malformations stated
I52	female	HP:0005863			Type E brachydactyly			no limb malformations stated
I53	male	HP:0005927; HP:0006265	HP:0009820	HP:0000175	Aplasia/hypoplasia involving bones of the hand; Aplasia/Hypoplasia of fingers	Lower limb peromelia	Cleft palate	no limb malformations stated
I54	male	HP:0009767; HP:0100558	HP:0010173	HP:0001249; HP:0004322; HP:0040199	Aplasia/Hypoplasia of the phalanges of the hand; Hemiatrophy of upper limb	Aplasia/Hypoplasia of the phalanges of the toes	Intellectual disability; Short stature; Flat midface	no limb malformations stated
I55	male	HP:0006495; HP:0001180; HP:0006101; HP:0003041			Aplasia/Hypoplasia of the ulna; Finger syndactyly; Oligodactyly (hands); Humeroradial synostosis			no limb malformations stated
I56	male	HP:0010710; HP:0011939	HP:0004691		3-4 finger cutaneous syndactyly; 3-5 finger syndactyly	2-3 toe syndactyly		healthy mother, affected father
I57	female	HP:0005792; HP:0005773; HP:0011910; HP:0005720	HP:0003097; HP:0005736	HP:0004322	Short humerus; Short forearm; Shortening of all phalanges of fingers; Shortening of all metacarpals	Short femur; Short tibia	Short stature; Skeletal dysplasia	singleton, no limb malformations stated
I58	female	HP:0005848; HP:0001177	HP:0001841		Bifid thumb distal phalanx; Preaxial hand polydactyly	Preaxial foot polydactyly		singleton, no limb malformations stated
I59	female	HP:0100258			Preaxial polydactyly			no limb malformations stated
I60	female	HP:0012165; HP:0006101; HP:0001500; HP:0011304			Oligodactyly; Finger syndactyly; Broad finger; Broad thumb			no limb malformations stated
I61	male	HP:0001156; HP:0010554	HP:0009779; HP:0004691		Brachydactyly syndrome; Cutaneous finger syndactyly	2-3 toe syndactyly; 3-4 toe syndactyly		no limb malformations stated
I62	male		HP:0012165; HP:0009820; HP:0001770; HP:0010443			Lower limb peromelia; Toe Syndactyly; Bifid femur; Oligodactyly		no limb malformations stated
I63	male	HP:0012165; HP:0001159; HP:0100262	HP:0002982; HP:0002990		Oligodactyly; Syndactyly; Synostosis involving digits	Fibular aplasia; Tibial bowing		no limb malformations stated
I64	male	HP:0100257	HP:0100257	HP:0001631	Ectrodactyly	Ectrodactyly	Atrial septal defect	no limb malformations stated
I65	female	HP:0003974; HP:0009777; HP:0004059; HP:0003031			Absent radius; Absent thumb; Radial club hand; Ulnar bowing			no limb malformations stated
I66	male	HP:0003974; HP:0001159; HP:0009777; HP:0009380			Absent radius; Syndactyly; Absent thumb; Aplasia of the fingers			no limb malformations stated
I67	male	HP:0006265	HP:0001991		Aplasia/Hypoplasia of fingers	Aplasia/Hypoplasia of toe		no limb malformations stated
I68	male	HP:0001199; HP:0006501; HP:0004059; HPO:0001180			Triphalangeal thumb; Aplasia/Hypoplasia of the radius; Radial club hand; Oligodactyly			no limb malformations stated
I69	female		HP:0001776; HP:0005873; HP:0001841	HP:0002652; HP:0002867		Abnormality of the ilium; Skeletal dysplasia; Preaxial foot polydactyly; Polysyndactyly of hallux; Bilateral talipes equinovarus	Skeletal dysplasia	no limb malformations stated
I70	male	HP:0001156	HP:0001156		Brachydactyly	Brachydactyly		no limb malformations stated
