# Supplementary material for: Genome sequencing in families with congenital limb malformations
Source: Hum Genet. 2021 Jun 22;140(8):1229–39. doi: 10.1007/s00439-021-02295-y (PMC8263393; doi:10.1007/s00439-021-02295-y)
Supplement: Supplementary file 2 — Supplementary file2 (XLSX 9 KB) [file 439_2021_2295_MOESM2_ESM.xlsx]

## Sheet: Tabelle1
Filter	Hom. count (public DBs)	Het. count (public DBs)	Carrier frequency (public DBs)	Hom. count (in-house)	Het. count (in-house)
Trio comp. het.	10	10	0.005	20	10
Trio de novo	10	-	0.01	20	-
Trio hom.	10	-	0.01	20	-
Trio X-linked	10	10	0.005	20	10
Single het	10	10	0.01	20	10
Single hom	10	-	0.01	20	-
Trio het	10	10	0.01	20	10
(parent affected)
Trio hom	10	-	0.01	20	-
(parent affected)
