# Supplementary material for: Genome sequencing in families with congenital limb malformations
Source: Hum Genet. 2021 Jun 22;140(8):1229–39. doi: 10.1007/s00439-021-02295-y (PMC8263393; doi:10.1007/s00439-021-02295-y)
Supplement: Supplementary file 3 — Supplementary file3 (XLSX 9 KB) [file 439_2021_2295_MOESM3_ESM.xlsx]

## Sheet: Tabelle1
Filter	Min overlap	Max carriers/alleles	Collective background	Pedigree affected	min SR+PR cov.	Min SR + PR var.
Trio De novo	0.75	10	2	1	2	2
Trio SVs	0.75	10	2	1	5	5
>30 calls
Singleton	0.75	5	2	1	5	5
Trio	0.75	10	2	1	2	2
(affected parent)
